# Supplementary material for: The influence of primary thyroid cancer to the prognosis of breast cancer: A SEER-based study
Source: Research Square preprint supplement (doi:10.21203/rs.3.rs-290018/v1), 2021-03-15
Supplement: Supplementary file 1 [file 4f82de497f494bec319102d8.docx]

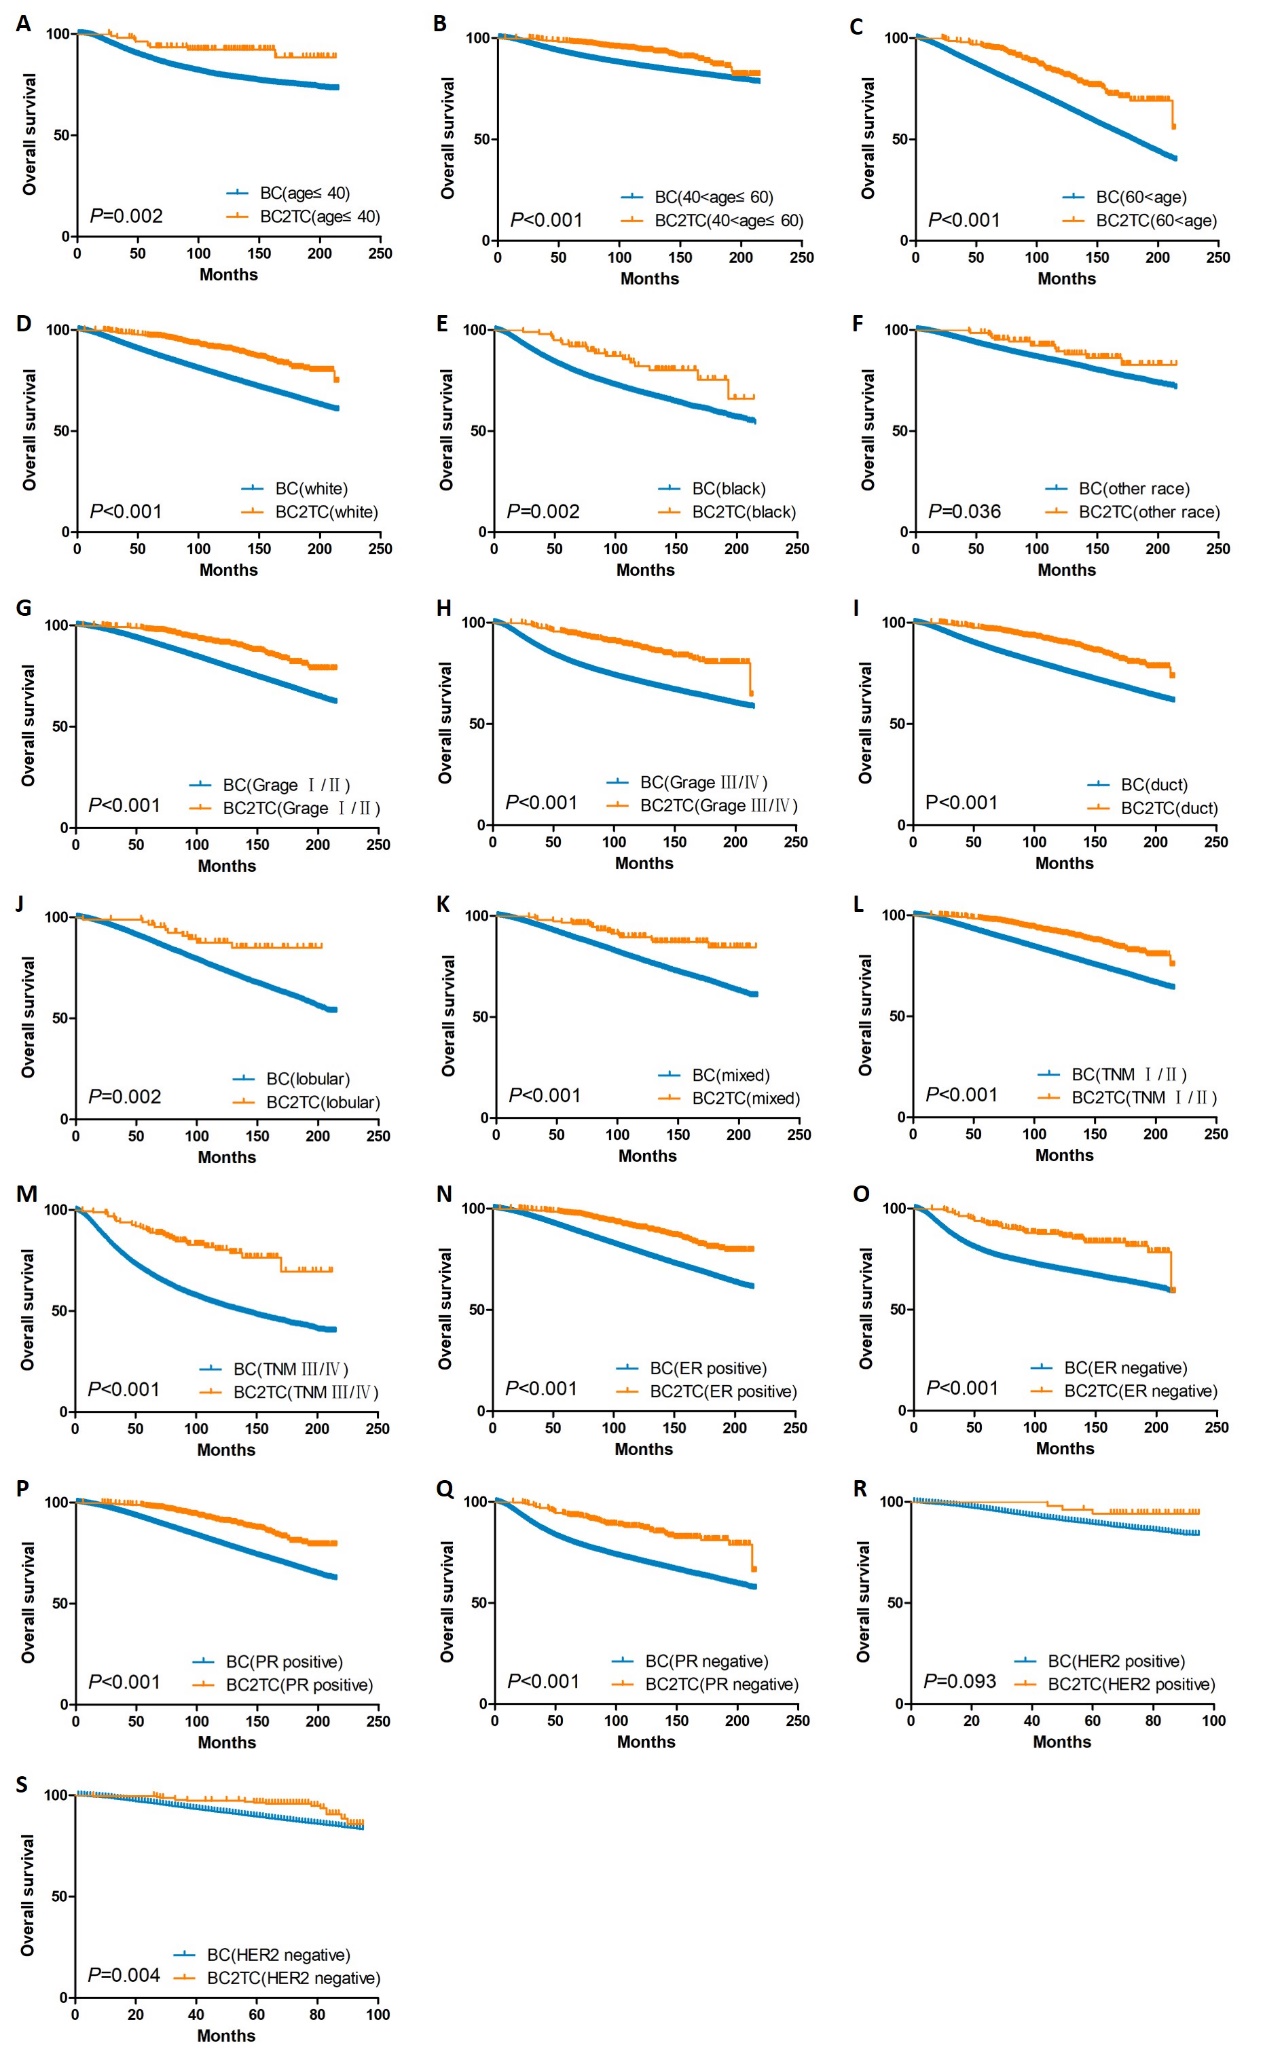


Figure S1. The subgroup survival analysis for OS of patients in the BC2TC and BC groups


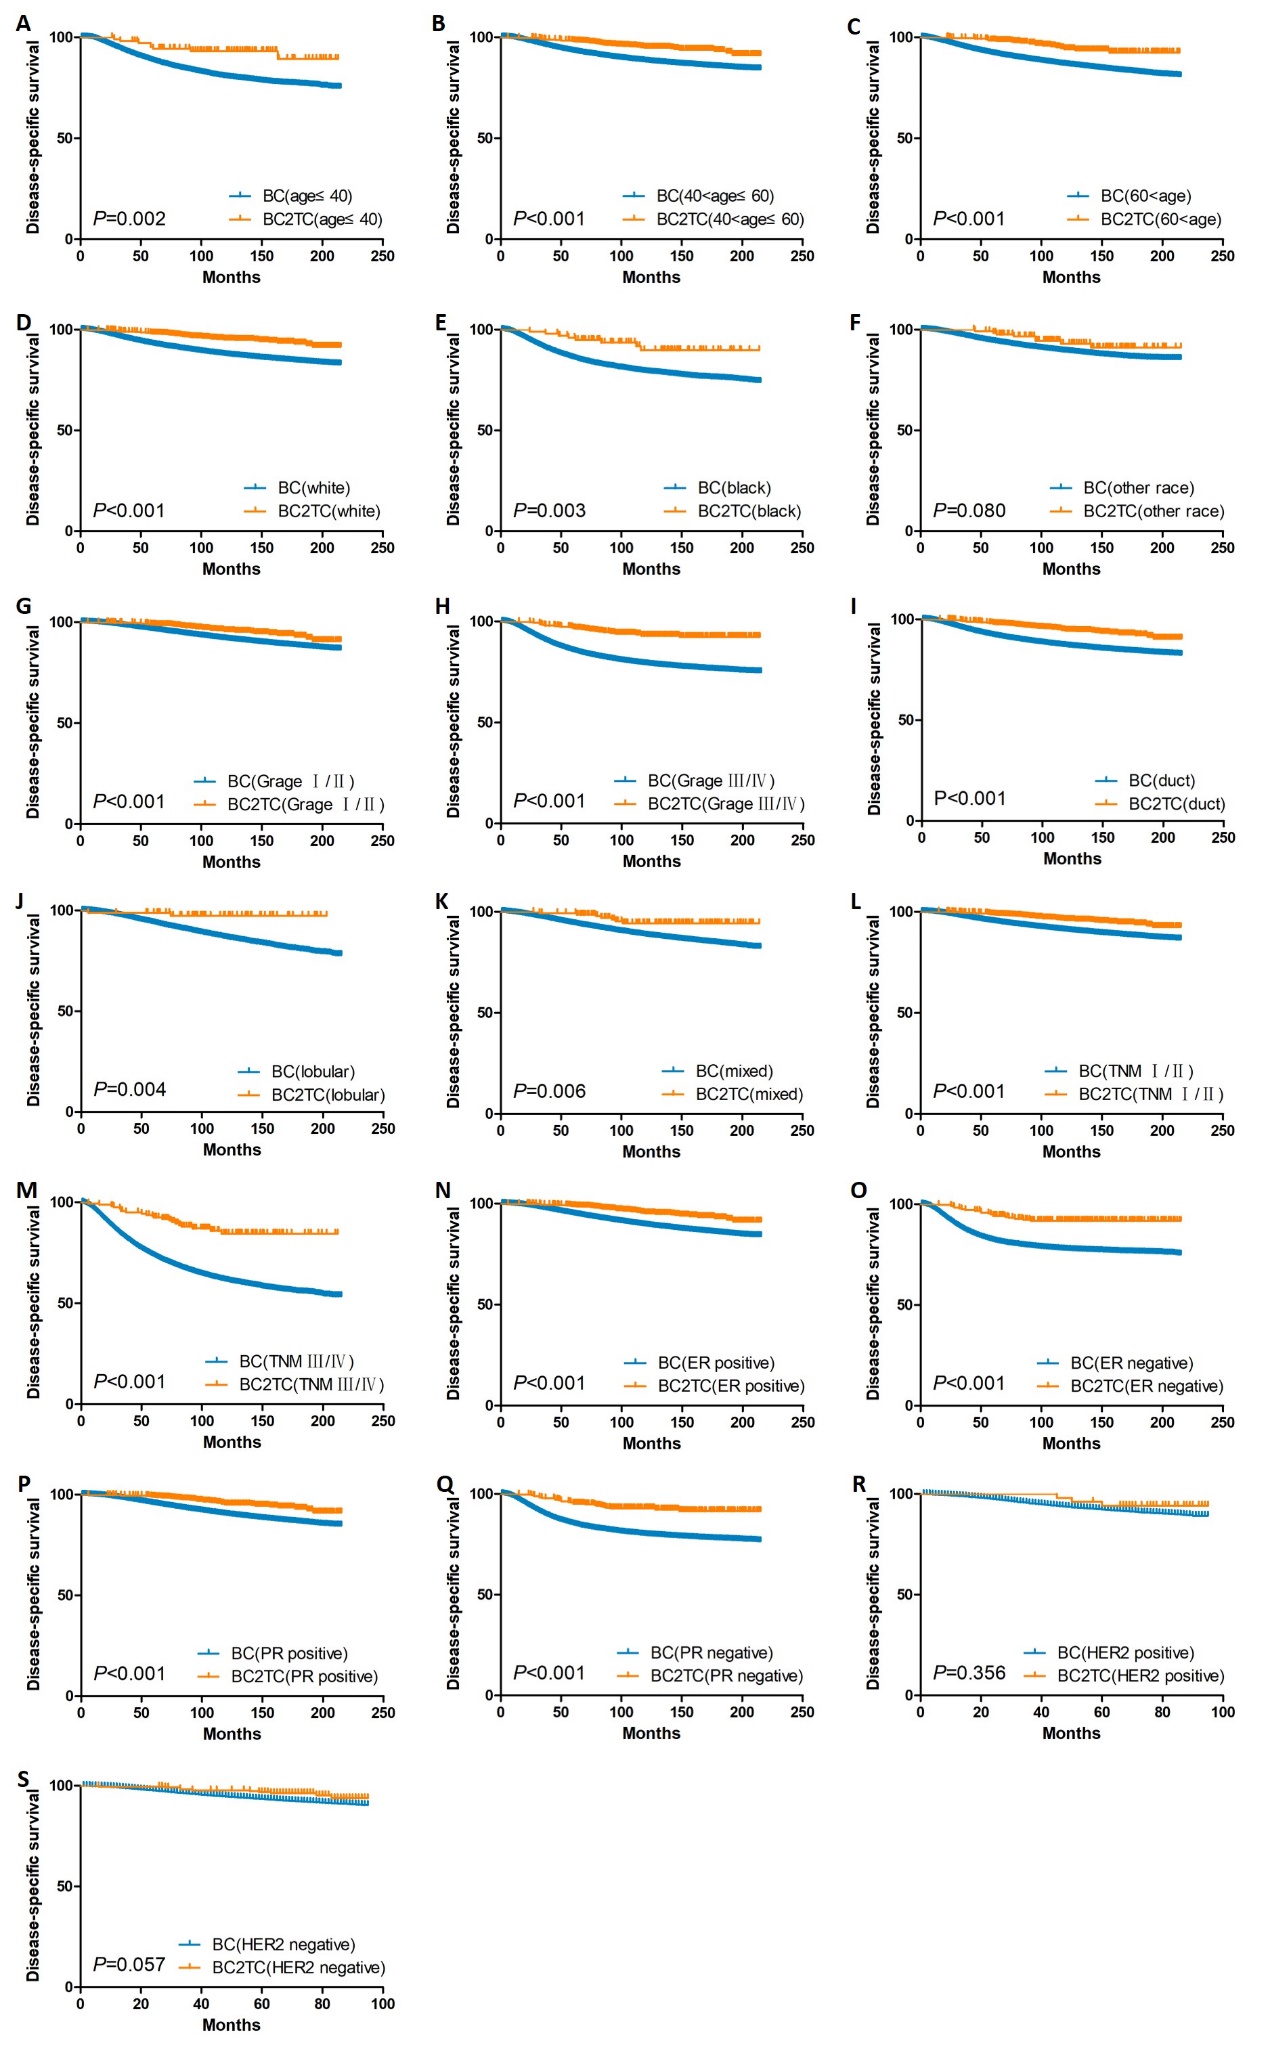


Figure S2. The subgroup survival analysis for DSS of patients in the BC2TC and BC groups


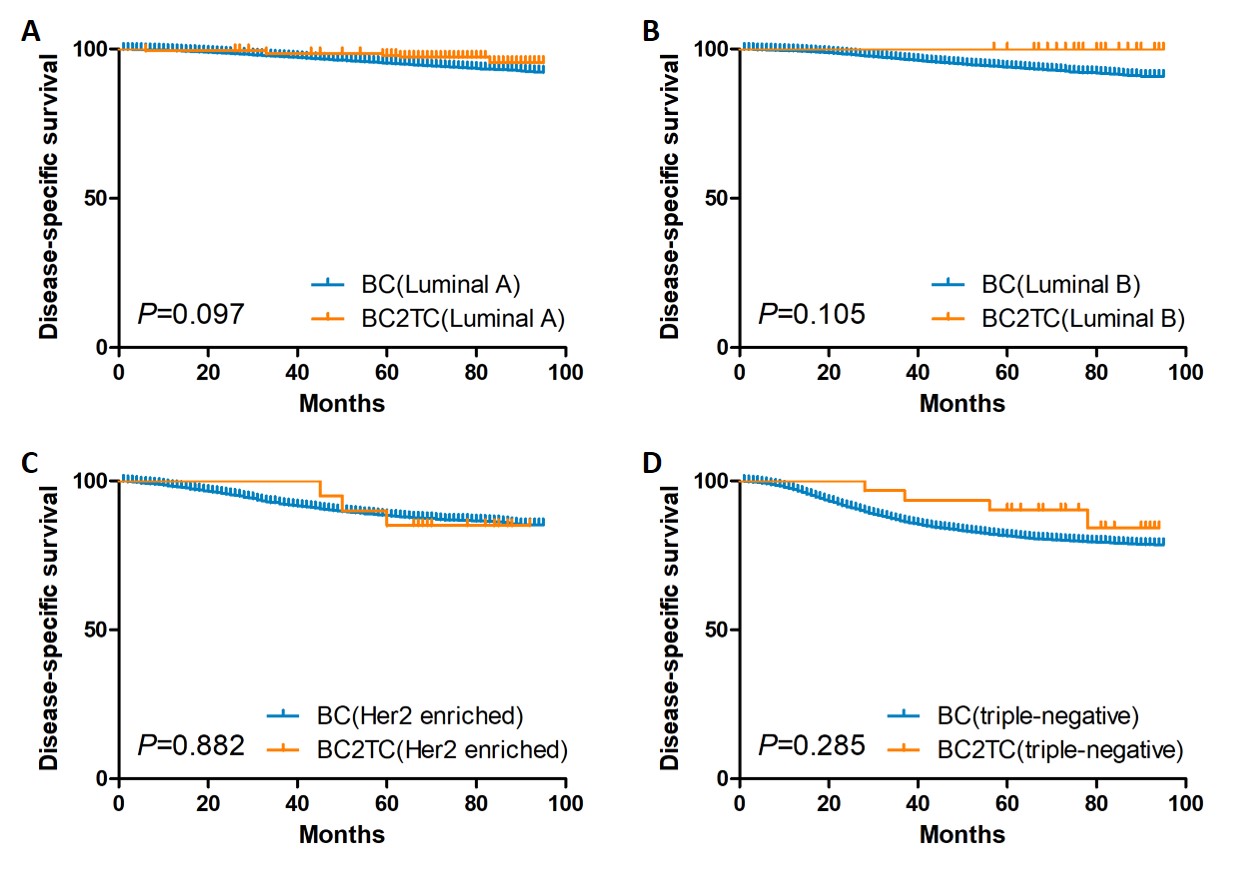


Figure S3. The DSS of patients between BC2TC and BC groups in the subgroup survival analysis for breast cancer subtypes
